# Supplementary material for: A two-stage game theoretic approach for self-organizing networks
Source: Springer Nature journal article supplement (doi:10.1186/1687-1499-2013-119), 2013-05-02
Supplement: 13638_2012_716_MOESM2_ESM.pdf [file 13638_2012_716_MOESM2_ESM.pdf]

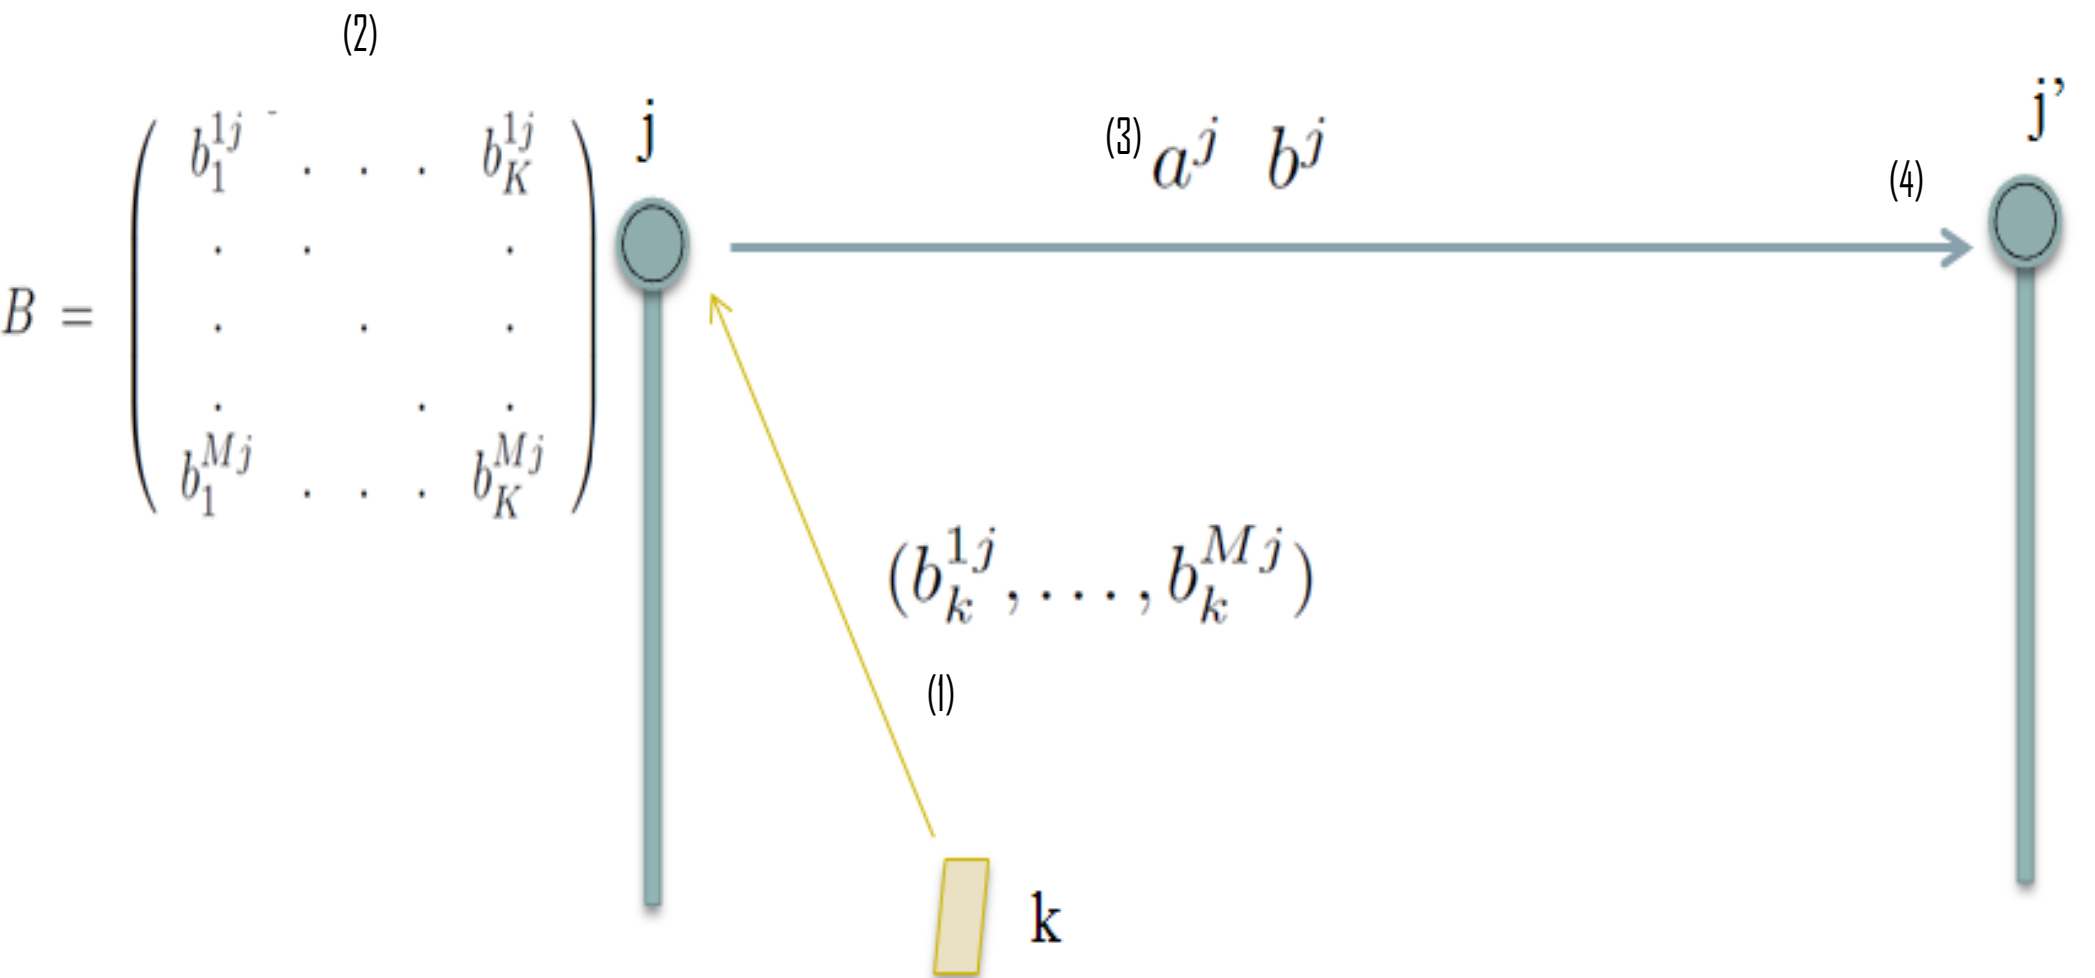

$$b_k^{mj} = (P(m, n') \cdot h_{m,k}, n' \in \mathcal{N})$$

$$b^j = \begin{pmatrix} b_1^{j'j}, & \cdots, & b_K^{j'j} \\ b_1^{jj}, & \cdots, & b_K^{jj} \end{pmatrix}$$

$$a_k^j = \sum_m b_k^{mj}$$

$$a^j = (a_k^j, k = 1, \dots, K)$$
