# Supplementary material for: A two-stage game theoretic approach for self-organizing networks
Source: Springer Nature journal article supplement (doi:10.1186/1687-1499-2013-119), 2013-05-02

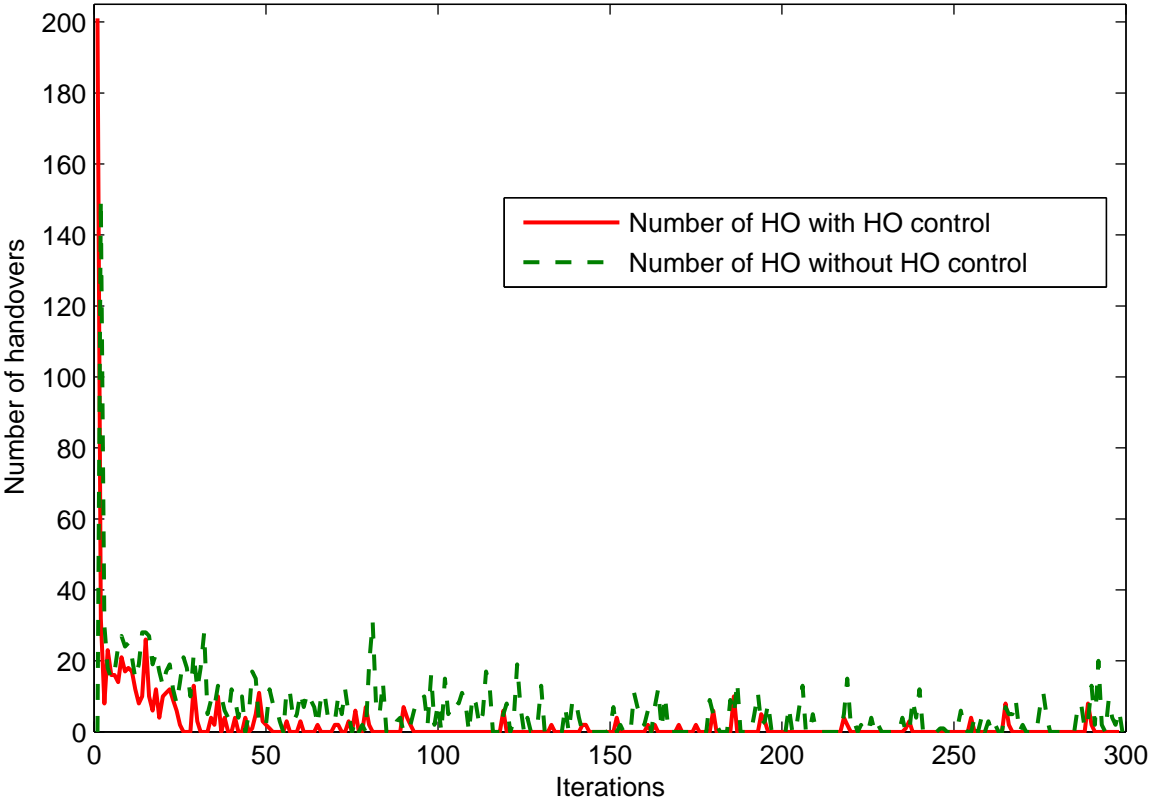

Supplement: 13638_2012_716_MOESM3_ESM.pdf [file 13638_2012_716_MOESM3_ESM.pdf]
